# Supplementary material for: Comparison of Superior Mesenteric Artery Remodeling and Clinical Outcomes between Conservative or Endovascular Treatment in Spontaneous Isolated Superior Mesenteric Artery Dissection
Source: MDPI journal article supplement (doi:10.3390/jcm11020465), 2022-01-17
Supplement: s1 [file s1]

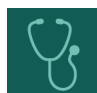

**Table S1.** Patients demographic, CT scan morphology and follow-up data.

|                            |       | Total       | Asymptomatic SIDSMA | Symptomatic SIDSMA |       |             | p Value |
|----------------------------|-------|-------------|---------------------|--------------------|-------|-------------|---------|
|                            |       | n =34       | n=10                |                    | n=24  |             |         |
| Age                        | 58.0  | 47.3–64.8   | 63.0                | 59.8–65.0          | 55.0  | 46.5–61     | 0.033   |
| Male                       | 31.0  | 91.2%       | 9.0                 | 90.0%              | 22.0  | 91.7%       | 0.440   |
| BMI                        | 25.3  | 22.4–27.2   | 23.8                | 22.2–25.2          | 26.2  | 22.4–27.3   | 0.093   |
| Smoking                    | 9.0   | 26.5%       | 1.0                 | 10.0%              | 8.0   | 33.3%       | 0.085   |
| Alcohol                    | 5.0   | 14.7%       | 0.0                 | 0.0%               | 5.0   | 20.8%       | 0.063   |
| Hypertension               | 17.0  | 50.0%       | 5.0                 | 50.0%              | 12.0  | 50.0%       | 0.500   |
| SBP(mm-Hg)                 | 143.0 | 135.0–164.0 | 135.0               | 116.0–140.0        | 147.0 | 137.0–166.0 | 0.010   |
| DBP(mm-Hg)                 | 90.0  | 83.0–97.0   | 80.0                | 68.0–90.0          | 92.5  | 83.0–97.3   | 0.027   |
| DM                         | 4.0   | 11.8%       | 0.0                 | 0.0%               | 4.0   | 16.7%       | 0.090   |
| Dyslipidemia               | 3.0   | 8.8%        | 1.0                 | 10.0%              | 2.0   | 8.3%        | 0.440   |
| CAD                        | 1.0   | 2.9%        | 0.0                 | 0.0%               | 1.0   | 4.2%        | 0.263   |
| Medications                |       |             |                     |                    |       |             |         |
| Beta-blokcer               | 28    | 82.3%       | 8                   | 80.0%              | 21    | 87.5%       | 0.484   |
| ARB or ACEI                | 26    | 76.4%       | 7                   | 70.0%              | 18    | 75.0%       | 0.339   |
| Pain duration (day)        | 1.0   | 0.0–2.0     | 0.0                 | 0.0–0.0            | 1.0   | 1.0–3.0     | 0.000   |
| Pain score                 | 6.0   | 0.0–7.0     | 0.0                 | 0.0–0.0            | 7.0   | 5.8–8.0     | <0.001  |
| EVT                        | 11.0  | 32.4%       | 1.0                 | 10.0%              | 10.0  | 41.7%       | 0.038   |
| Nausea                     | 6.0   | 17.6%       | 0.0                 | 0.0%               | 6.0   | 25.0%       | 0.043   |
| Vomiting                   | 7.0   | 20.6%       | 0.0                 | 0.0%               | 7.0   | 29.2%       | 0.029   |
| CT morphology              |       |             |                     |                    |       |             |         |
| SMA dissection length (mm) | 65.8  | 38.3–107.3  | 41.5                | 20.5–62.0          | 75.0  | 60.9–121.0  | 0.009   |
| TLD_T0 (mm)                | 12.0  | 11.0–13.0   | 12.0                | 11.5–12.8          | 12.0  | 10.9–13.0   | 0.068   |
| TD_T0 (mm)                 | 5.0   | 4.0–6.0     | 5.9                 | 5.1–6.0            | 5.0   | 3.0–6.0     | 0.146   |
| FD_T0 (mm)                 | 7.0   | 6.0–9.0     | 6.5                 | 5.8–7.0            | 8.0   | 5.5–9.0     | 0.087   |
| Yun classification         |       |             |                     |                    |       |             |         |
| I                          | 4.0   | 11.8%       | 3.0                 | 30.0%              | 1.0   | 4.2%        | 0.203   |
| Ila                        | 5.0   | 14.7%       | 2.0                 | 20.0%              | 3.0   | 12.5%       | 0.388   |
| I Ib                       | 23.0  | 67.6%       | 4.0                 | 40.0%              | 19.0  | 79.2%       | 0.245   |
| III                        | 2.0   | 5.9%        | 1.0                 | 10.0%              | 1.0   | 4.2%        | 0.453   |
| ICU stay (day)             | 0.0   | 0.0–0.8     | 0.0                 | 0.0–0.0            | 0.0   | 0.0–2.0     | 0.021   |
| Hospitalization (day)      | 3.0   | 0.0–5.8     | 0.0–3.5             | 0.0–3.5            | 10.0  | 3.0–12.3    | <0.001  |
| Symptoms resolution (day)  | 1.0   | 0.0–2.0     | 0.0                 | 0.0–0.0            | 2.0   | 1.0–3.5     | 0.012   |
| Anticoagulation use        | 20.0  | 58.8%       | 2.0                 | 20.0%              | 18.0  | 75.0%       | 0.001   |
| Follow up                  |       | n=25        | n=17                |                    | n=8   |             |         |
| CT morphology              |       |             |                     |                    |       |             |         |
| TLD_T1 (mm)                | 11.0  | 9.4–13.0    | 11.0                | 9.4–12.5           | 11.0  | 9.8–13.0    | 0.104   |
| TD_T1 (mm)                 | 7.4   | 7.0–9.0     | 7.0                 | 6.0–7.4            | 8.0   | 1.0–10.0    | 0.021   |
| FD_T1 (mm)                 | 1.8   | 0.0–5.8     | 5.2                 | 2.6–6.0            | 0.0   | 0.0–5.5     | 0.062   |
| Last CT scan (month)       | 21.9  | 10.4–41.7   | 41.7                | 10.3–44.2          | 19.5  | 11.0–33.5   | 0.190   |
| Follow up (month)          | 23.3  | 9.7–55.2    | 44.2                | 8.1–68.6           | 25.9  | 11.0–49.6   | 0.401   |

Data are presented as n (%) or mean  $\pm$  stand deviation. \*Non-parametric continuous data are presented as median  $\pm$  interquadrant range (25%–75%). SIDSMA: spontaenous isolated dissection of superior mesenteric artery, EVT: endovascular superior mesenteric artery stenting, BMI: body mass index, DM: diabetes mellitus, CAD: coronary artery disease, SBP: systoloc blood pressure, DBP: diastolic blood pressure, ARB: angiotension II receptor blocker, ACEI: angiotension converting enzyme inhibitor, CT: computed tomography, SMA: superior mensenteric artery, TLD\_T0: initial total lumen diameter, TD\_T0: initial true lumen diameter, FD\_T0: initial false lumen diameter, TLD\_T1: last total lumen diameter, TD\_T1: last true lumen diameter, FD\_T1: last false lumen diameter, ICU: intensive care unit.
