# Supplementary material for: Comparison of Superior Mesenteric Artery Remodeling and Clinical Outcomes between Conservative or Endovascular Treatment in Spontaneous Isolated Superior Mesenteric Artery Dissection
Source: MDPI journal article supplement (doi:10.3390/jcm11020465), 2022-01-17
Supplement: s1 [file s1]

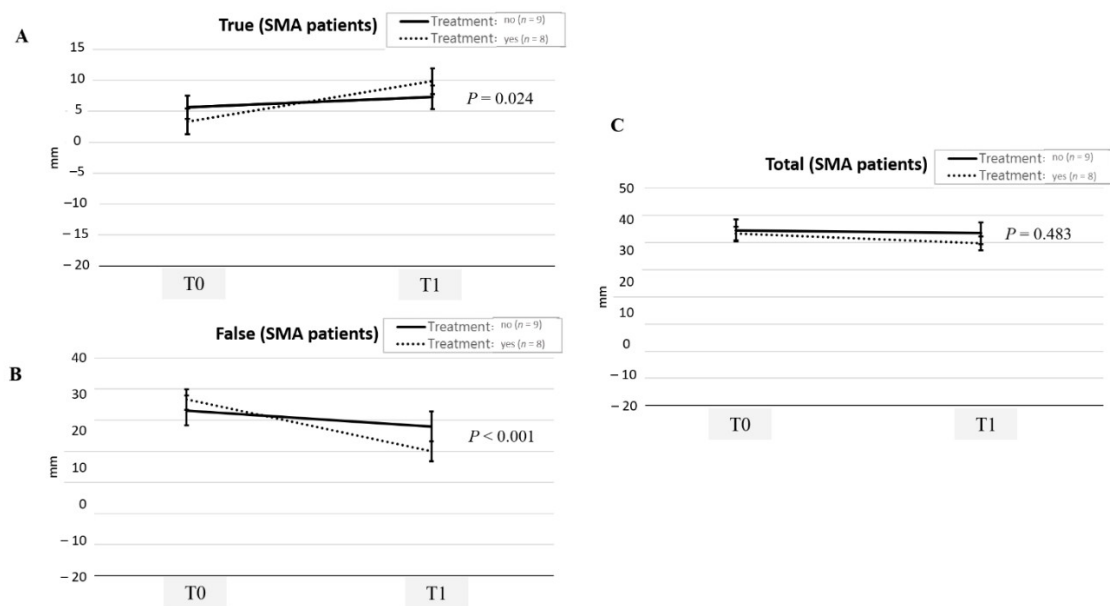

**Supplementary Figure S2.** Total, true and false lumen of superior mesenteric artery diameter change during the computed tomography scan follow up after excluding asymptomatic cases.
